# Supplementary material for: Third COVID-19 vaccine dose boosts neutralizing antibodies in poor responders
Source: PubMed Central journal article supplement (PMC9273613; doi:10.1038/s43856-022-00151-2), 2022-07-11
Supplement: 43856_2022_151_MOESM3_ESM.pdf [file 43856_2022_151_MOESM3_ESM.pdf]

## **Supplementary Materials**

This material has been provided to give readers additional information about the work.

Supplement to: Douglas F. Lake, Alexa J. Roeder, et. Al. Third COVID-19 Vaccine Dose Boosts Neutralizing Antibodies in Poor Responders

**Supplementary Figure S1 – Regression analysis of LFA density values and microneutralization IC<sub>50</sub> values.**

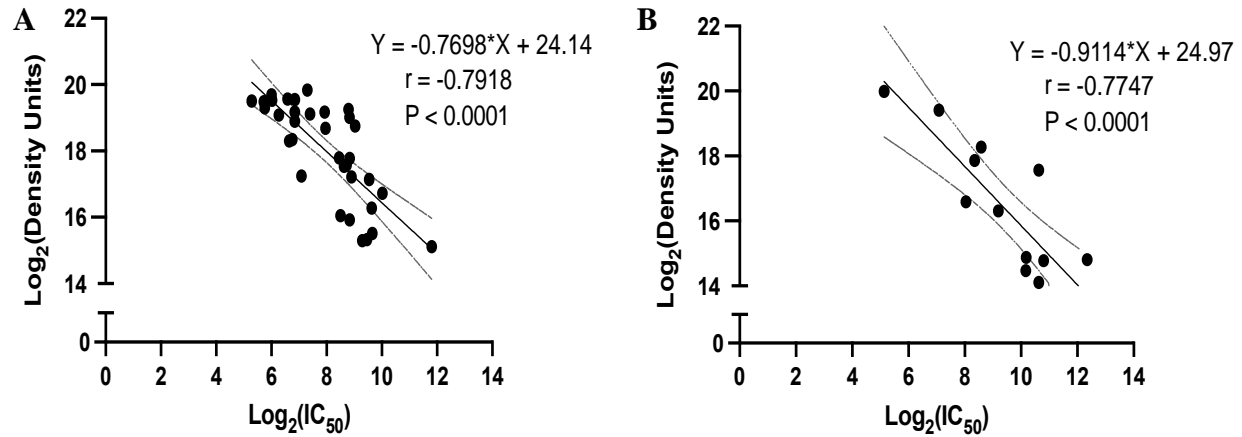

**Supplementary Figure S1.** Comparison between LFA density units and IC<sub>50</sub> values obtained using **A**) convalescent sera isolated from 36 recovered COVID-19 patients and **B**) vaccinated sera from 13 individuals. Neutralization was tested on LFA using 6  $\mu$ L serum and a dilution series was performed by authentic SARS-CoV-2 FRNT assay to obtain IC<sub>50</sub> values. To calculate IC<sub>50</sub>, data were analyzed in GraphPad Prism 9.0 using methods described by Ferrara and Temperton. Density values and IC<sub>50</sub> values were Log<sub>2</sub>-transformed and analyzed using a simple linear regression and nonparametric Spearman correlation with two-tailed P value and a 95% confidence interval (CI). Regression analysis with 95% CI boundaries is indicated in solid black and grey dotted lines. Spearman's rho and two-tailed P value are labeled.

**Supplementary Figure S2 – NAb LFA Tests with Density Values, IC50s, NAb Titers, and Percent Neutralization**

|                        | VAC-93    | VAC-81   | VAC-77    | VAC-82     | VAC-74     | VAC-99   |
|------------------------|-----------|----------|-----------|------------|------------|----------|
| <b>TLD</b>             | 1,007,231 | 765,297  | 477,787   | 295,032    | 156,481    | 14,212   |
| <b>IC<sub>50</sub></b> | 43.8      | 62.6     | 115.4     | 215.9      | 492.2      | 11,103.9 |
| <b>NAb Titer</b>       | ≤ 40      | ≥40, <80 | ≥80, <160 | ≥160, <320 | ≥320, >640 | ≥640     |
| <b>% Neut</b>          | 0         | 19       | 49        | 69         | 84         | 99       |

  

**Supplementary Figure S2.** LFA densitometer images with corresponding Test Line Density (TLD), IC<sub>50</sub> value, reciprocal NAb titer, and percent neutralization. TLD is reported as unmodified, discrete values. IC<sub>50</sub> values are derived from the regression equation shown in Supplementary **Figure S1**. Reciprocal NAb titer is derived from IC<sub>50</sub>, such that titer is equal to the last dilution factor (DF) (DF = 20\*2<sup>-n</sup>) for which IC<sub>50</sub> is ≥ the lower threshold range for a given titer. For example, IC<sub>50</sub>=43.8 is classified as an NAb titer of 40. Further, a hypothetical IC<sub>50</sub>=158 would classify as NAb titer ≥80 and <160. Percent neutralization was calculated using the equation: 1-(TLD/LoD) when LoD=942,481 as described in **Table 1** legend.
